# Supplementary material for: General practitioner management related to skin cancer prevention and screening during standard medical encounters: a French cross-sectional study based on the International Classification of Primary Care
Source: PubMed Central journal article supplement — BMJ Open. 2017 Jan 30;7(1):e013033. doi: 10.1136/bmjopen-2016-013033 (PMC5293869; doi:10.1136/bmjopen-2016-013033), 2017-01-30
Supplement: bmjopen-2016-013033supp.pdf [file bmjopen-2016-013033supp.pdf]

**ICPC-2 – English**  
**International Classification of**  
**Primary Care – 2<sup>nd</sup> Edition**  
**Wonca International**  
**Classification Committee**  
**(WICC)**

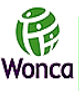

**Process codes**

- 30 Medical Exam/Eval-Complete
- 31 Medical Examination/Health Evaluation-Partial/Pre-op check
- 32 Sensitivity Test
- 33 Microbiological/Immunological Test
- 34 Blood Test
- 35 Urine Test
- 36 Faeces Test
- 37 Histological/Exfoliative Cytology
- 38 Other Laboratory Test NEC
- 39 Physical Function Test
- 40 Diagnostic Endoscopy
- 41 Diagnostic Radiology/Imaging
- 42 Electrical Tracings
- 43 Other Diagnostic Procedures
- 44 Preventive Immunisations/Medications
- 45 Observe/Educate/Advice/Diet
- 46 Consult with Primary Care Provider
- 47 Consultation with Specialist
- 48 Clarification/Discuss Patient's RFE
- 49 Other Preventive Procedures
- 50 Medicat-Script/Reqst/Renew/Inject
- 51 Incise/Drain/Flush/Aspirate
- 52 Excise/Remove/Biopsy/Destruction/Debride
- 53 Instrument/Catheter/Intubate/Dilate
- 54 Repair/Fixate-Suture/Cast/Prosthetic
- 55 Local Injection/Infiltration
- 56 Dress/Press/Compress/Tamponade
- 57 Physical Medicine/Rehabilitation
- 58 Therapeutic Counselling/Listening
- 59 Other Therapeutic Procedure NEC
- 60 Results Tests/Procedures
- 61 Results Exam/Test/Record
- 62 Administrative Procedure
- 63 Follow-up Encounter Unspecified
- 64 Encounter Initiated by Provider
- 65 Encounter Initiated third person
- 66 Refer to Other Provider (EXCL. M.D.)
- 67 Referral to Physician/Specialist/Clinic/Hospital
- 68 Other Referrals NEC
- 69 Other Reason for Encounter NEC

**General and Unspecified** **A**

- A01 Pain general/multiple sites
- A02 Chills
- A03 Fever
- A04 Weakness/tiredness general
- A05 Feeling ill
- A06 Fainting/syncope
- A07 Coma
- A08 Swelling
- A09 Sweating problem
- A10 Bleeding/haemorrhage NOS
- A11 Chest pain NOS
- A13 Concern/fear medical treatment
- A16 Irritable infant
- A18 Concern about appearance
- A20 Euthanasia request/discussion
- A21 Risk factor for malignancy
- A23 Risk factor NOS
- A25 Fear of death/dying
- A26 Fear of cancer NOS
- A27 Fear of other disease NOS
- A28 Limited function/disability NOS
- A29 General symptom/complaint other
- A70 Tuberculosis
- A71 Measles
- A72 Chickenpox
- A73 Malaria
- A74 Rubella
- A75 Infectious mononucleosis
- A76 Viral exanthem other
- A77 Viral disease other/NOS
- A78 Infectious disease other/NOS
- A79 Malignancy NOS
- A80 Trauma/injury NOS
- A81 Multiple trauma/injuries
- A82 Secondary effect of trauma
- A84 Poisoning by medical agent
- A85 Adverse effect medical agent
- A86 Toxic effect non-medicinal substance
- A87 Complication of medical treatment
- A88 Adverse effect physical factor
- A89 Effect prosthetic device
- A90 Congenital anomaly OS/multiple
- A91 Abnormal result investigation NOS
- A92 Allergy/allergic reaction NOS
- A93 Premature newborn
- A94 Perinatal morbidity other
- A95 Perinatal mortality
- A96 Death
- A97 No disease
- A98 Health maintenance/prevention
- A99 General disease NOS

**Blood, Blood Forming Organs and Immune Mechanism** **B**

- B02 Lymph gland(s) enlarged/painful
- B04 Blood symptom/complaint
- B25 Fear of aids/HIV
- B26 Fear cancer blood/lymph
- B27 Fear blood/lymph disease other
- B28 Limited function/disability
- B29 Symp/compl lymph/immune other
- B70 Lymphadenitis acute
- B71 Lymphadenitis non-specific
- B72 Hodgkin's disease/lymphoma
- B73 Leukaemia
- B74 Malignant neoplasm blood other
- B75 Benign/unspecified neoplasm blood
- B76 Ruptured spleen traumatic
- B77 Injury blood/lymph/spleen other
- B78 Hereditary haemolytic anaemia
- B79 Congen.anom. blood/lymph other
- B80 Iron deficiency anaemia
- B81 Anaemia, Vitamin B12/folate def.
- B82 Anaemia other/unspecified
- B83 Purpura/coagulation defect
- B84 Unexplained abnormal white cells
- B87 Splenomegaly
- B90 HIV-infection/aids
- B99 Blood/lymph/spleen disease other

**PROCESS CODES**

**SYMPTOMS/COMPLAINTS**

**INFECTIONS**

**NEOPLASMS**

**INJURIES**

**CONGENITAL ANOMALIES**

**OTHER DIAGNOSES**

**Digestive** **D**

- D01 Abdominal pain/cramps general
- D02 Abdominal pain epigastric
- D03 Heartburn
- D04 Rectal/anal pain
- D05 Perianal itching
- D06 Abdominal pain localized other
- D07 Dyspepsia/indigestion
- D08 Flatulence/gas/belching
- D09 Nausea
- D10 Vomiting
- D11 Diarrhoea
- D12 Constipation
- D13 Jaundice
- D14 Haematemesis/vomiting blood
- D15 Melaena
- D16 Rectal bleeding
- D17 Incontinence of bowel
- D18 Change faeces/bowel movements
- D19 Teeth/gum symptom/complaint
- D20 Mouth/tongue/lip symptom/compl.
- D21 Swallowing problem
- D23 Hepatomegaly
- D24 Abdominal mass NOS
- D25 Abdominal distension
- D26 Fear of cancer of digestive system
- D27 Fear of digestive disease other
- D28 Limited function/disability (d)
- D29 Digestive symptom/complaint other
- D70 Gastrointestinal infection
- D71 Mumps
- D72 Viral hepatitis
- D73 Gastroenteritis presumed infection
- D74 Malignant neoplasm stomach
- D75 Malignant neoplasm colon/rectum
- D76 Malignant neoplasm pancreas
- D77 Malign. neoplasm digest other/NOS
- D78 Neoplasm digest benign/uncertain
- D79 Foreign body digestive system
- D80 Injury digestive system other
- D81 Congen. anomaly digestive system
- D82 Teeth/gum disease
- D83 Mouth/tongue/lip disease
- D84 Oesophagus disease
- D85 Duodenal ulcer
- D86 Peptic ulcer other
- D87 Stomach function disorder
- D88 Appendicitis
- D89 Inguinal hernia
- D90 Hiatus hernia
- D91 Abdominal hernia other
- D92 Diverticular disease
- D93 Irritable bowel syndrome
- D94 Chronic enteritis/ulcerative colitis
- D95 Anal fissure/perianal abscess
- D96 Worms/other parasites
- D97 Liver disease NOS
- D98 Cholecystitis/cholelithiasis
- D99 Disease digestive system, other

**Eye** **F**

- F01 Eye pain
- F02 Red eye
- F03 Eye discharge
- F04 Visual floaters/spots
- F05 Visual disturbance other
- F13 Eye sensation abnormal
- F14 Eye movements abnormal
- F15 Eye appearance abnormal
- F16 Eyelid symptom/complaint
- F17 Glasses symptom/complaint
- F18 Contact lens symptom/complaint
- F27 Fear of eye disease
- F28 Limited function/disability (f)
- F29 Eye symptom/complaint other
- F70 Conjunctivitis infectious
- F71 Conjunctivitis allergic
- F72 Blepharitis/stye/chalazion
- F73 Eye infection/inflammation other
- F74 Neoplasm of eye/adnexa
- F75 Contusion/haemorrhage eye
- F76 Foreign body in eye
- F79 Injury eye other
- F80 Blocked lacrimal duct of infant
- F81 Congenital anomaly eye other
- F82 Detached retina
- F83 Retinopathy
- F84 Macular degeneration
- F85 Corneal ulcer
- F86 Trachoma
- F91 Refractive error
- F92 Cataract
- F93 Glaucoma
- F94 Blindness
- F95 Strabismus
- F99 Eye/adnexa disease, other

**Ear** **H**

- H01 Ear pain/earache
- H02 Hearing complaint
- H03 Tinnitus, ringing/buzzing ear
- H04 Ear discharge
- H05 Bleeding ear
- H13 Plugged feeling ear
- H15 Concern with appearance of ears
- H27 Fear of ear disease
- H28 Limited function/disability other
- H29 Ear symptom/complaint other
- H70 Otitis externa
- H71 Acute otitis media/myringitis
- H72 Serous otitis media
- H73 Eustachian salpingitis
- H74 Chronic otitis media
- H75 Neoplasm of ear
- H76 Foreign body in ear
- H77 Perforation ear drum
- H78 Superficial injury of ear
- H79 Ear injury other
- H80 Congenital anomaly of ear
- H81 Excessive ear wax
- H82 Vertiginous syndrome
- H83 Otosclerosis
- H84 Presbycusis
- H85 Acoustic trauma
- H86 Deafness
- H99 Ear/mastoid disease, other

**Cardiovascular** **K**

- K01 Heart pain
- K02 Pressure/tightness of heart
- K03 Cardiovascular pain NOS
- K04 Palpitations/awareness of heart
- K05 Irregular heartbeat other
- K06 Prominent veins
- K07 Swollen ankles/oedema
- K22 Risk factor cardiovascular disease
- K24 Fear of heart disease
- K25 Fear of hypertension
- K27 Fear cardiovascular disease other
- K28 Limited function/disability (k)
- K29 Cardiovascular sympt./complt. other
- K70 Infection of circulatory system
- K71 Rheumatic fever/heart disease
- K72 Neoplasm cardiovascular
- K73 Congenital anomaly cardiovascular
- K74 Ischaemic heart disease w. angina
- K75 Acute myocardial infarction
- K76 Ischaemic heart disease w/o angina
- K77 Heart failure
- K78 Atrial fibrillation/flutter
- K79 Paroxysmal tachycardia
- K80 Cardiac arrhythmia NOS
- K81 Heart/arterial murmur NOS
- K82 Pulmonary heart disease
- K83 Heart valve disease NOS
- K84 Heart disease other
- K85 Elevated blood pressure
- K86 Hypertension uncomplicated
- K87 Hypertension complicated
- K88 Postural hypotension
- K89 Transient cerebral ischaemia
- K90 Stroke/cerebrovascular accident
- K91 Cerebrovascular disease
- K92 Atherosclerosis/PVD
- K93 Pulmonary embolism
- K94 Phlebitis/thrombophlebitis
- K95 Varicose veins of leg
- K96 Haemorrhoids
- K99 Cardiovascular disease other

**Musculoskeletal** **L**

- L01 Neck symptom/complaint
- L02 Back symptom/complaint
- L03 Low back symptom/complaint
- L04 Chest symptom/complaint
- L05 Flank/axilla symptom/complaint
- L07 Jaw symptom/complaint
- L08 Shoulder symptom/complaint
- L09 Arm symptom/complaint
- L10 Elbow symptom/complaint
- L11 Wrist symptom/complaint
- L12 Hand/finger symptom/complaint
- L13 Hip symptom/complaint
- L14 Leg/thigh symptom/complaint
- L15 Knee symptom/complaint
- L16 Ankle symptom/complaint
- L17 Foot/toe symptom/complaint
- L18 Muscle pain
- L19 Muscle symptom/complaint NOS
- L20 Joint symptom/complaint NOS
- L26 Fear of cancer musculoskeletal
- L27 Fear musculoskeletal disease other
- L28 Limited function/disability (l)
- L29 Symp/complt. Musculoskeletal other
- L70 Infections musculoskeletal system
- L71 Malignant neoplasm musculoskeletal
- L72 Fracture: radius/ulna
- L73 Fracture: tibia/fibula
- L74 Fracture: hand/foot bone
- L75 Fracture: femur
- L76 Fracture: other
- L77 Sprain/strain of ankle
- L78 Sprain/strain of knee
- L79 Sprain/strain of joint NOS
- L80 Dislocation/subluxation
- L81 Injury musculoskeletal NOS
- L82 Congenital anomaly musculoskeletal
- L83 Neck syndrome
- L84 Back syndrome w/o radiating pain
- L85 Acquired deformity of spine
- L86 Back syndrome with radiating pain
- L87 Bursitis/tendinitis/synovitis NOS
- L88 Rheumatoid/seropositive arthritis
- L89 Osteoarthritis of hip
- L90 Osteoarthritis of knee
- L91 Osteoarthritis other
- L92 Shoulder syndrome
- L93 Tennis elbow
- L94 Osteochondrosis
- L95 Osteoporosis
- L96 Acute internal damage knee
- L97 Neoplasm benign/unspec musculo.
- L98 Acquired deformity of limb
- L99 Musculoskeletal disease, other

**Neurological** **N**

- N01 Headache
- N03 Pain face
- N04 Restless legs
- N05 Tingling fingers/feet/toes
- N06 Sensation disturbance other
- N07 Convulsion/seizure
- N08 Abnormal involuntary movements
- N16 Disturbance of smell/taste
- N17 Vertigo/dizziness
- N18 Paralysis/weakness
- N19 Speech disorder
- N26 Fear cancer neurological system
- N27 Fear of neurological disease other
- N28 Limited function/disability (n)
- N29 Neurological symptom/complt. other
- N70 Poliomyelitis
- N71 Meningitis/encephalitis
- N72 Tetanus
- N73 Neurological infection other
- N74 Malignant neoplasm nervous system
- N75 Benign neoplasm nervous system
- N76 Neoplasm nervous system unspec.
- N79 Concussion
- N80 Head injury other
- N81 Injury nervous system other
- N85 Congenital anomaly neurological
- N86 Multiple sclerosis
- N87 Parkinsonism
- N88 Epilepsy
- N89 Migraine
- N90 Cluster headache
- N91 Facial paralysis/bell's palsy
- N92 Trigeminal neuralgia
- N93 Carpal tunnel syndrome
- N94 Peripheral neuritis/neuropathy
- N95 Tension headache
- N99 Neurological disease, other

| <b>Psychological</b>                     | <b>P</b> | <b>Skin</b>                                | <b>S</b> | <b>Urological</b>                               | <b>U</b>                                 |
|------------------------------------------|----------|--------------------------------------------|----------|-------------------------------------------------|------------------------------------------|
| P01 Feeling anxious/nervous/tense        |          | S01 Pain/tenderness of skin                |          | U01 Dysuria/painful urination                   | X75 Malignant neoplasm cervix            |
| P02 Acute stress reaction                |          | S02 Pruritus                               |          | U02 Urinary frequency/urgency                   | X76 Malignant neoplasm breast female     |
| P03 Feeling depressed                    |          | S03 Warts                                  |          | U04 Incontinence urine                          | X77 Malignant neoplasm genital other (f) |
| P04 Feeling/behaving irritable/angry     |          | S04 Lump/swelling localized                |          | U05 Urination problems other                    | X78 Fibromyoma uterus                    |
| P05 Senility, feeling/behaving old       |          | S05 Lumps/swellings generalized            |          | U06 Haematuria                                  | X79 Benign neoplasm breast female        |
| P06 Sleep disturbance                    |          | S06 Rash localized                         |          | U07 Urine symptom/complaint other               | X80 Benign neoplasm female genital       |
| P07 Sexual desire reduced                |          | S07 Rash generalized                       |          | U08 Urinary retention                           | X81 Genital neoplasm oth/unspcied (f)    |
| P08 Sexual fulfilment reduced            |          | S08 Skin colour change                     |          | U13 Bladder symptom/complaint other             | X82 Injury genital female                |
| P09 Sexual preference concern            |          | S09 Infected finger/toe                    |          | U14 Kidney symptom/complaint                    | X83 Congenital anomaly genital female    |
| P10 Stammering/stuttering/tic            |          | S10 Boil/carbuncle                         |          | U26 Fear of cancer of urinary system            | X84 Vaginitis/vulvitis NOS               |
| P11 Eating problem in child              |          | S11 Skin infection post-traumatic          |          | U27 Fear of urinary disease other               | X85 Cervical disease NOS                 |
| P12 Bedwetting/enuresis                  |          | S12 Insect bite/sting                      |          | U28 Limited function/disability urinary         | X86 Abnormal cervix smear                |
| P13 Encopresis/bowel training problem    |          | S13 Animal/human bite                      |          | U29 Urinary symptom/complaint other             | X87 Uterovaginal prolapse                |
| P15 Chronic alcohol abuse                |          | S14 Burn/scald                             |          | U70 Pyelonephritis/pyelitis                     | X88 Fibrocystic disease breast           |
| P16 Acute alcohol abuse                  |          | S15 Foreign body in skin                   |          | U71 Cystitis/urinary infection other            | X89 Premenstrual tension syndrome        |
| P17 Tobacco abuse                        |          | S16 Bruise/contusion                       |          | U72 Urethritis                                  | X90 Genital herpes female                |
| P18 Medication abuse                     |          | S17 Abrasion/scratch/blister               |          | U75 Malignant neoplasm of kidney                | X91 Condylomata acuminata female         |
| P19 Drug abuse                           |          | S18 Laceration/cut                         |          | U76 Malignant neoplasm of bladder               | X92 Chlamydia infection genital (f)      |
| P20 Memory disturbance                   |          | S19 Skin injury other                      |          | U77 Malignant neoplasm urinary other            | X99 Genital disease female, other        |
| P22 Child behaviour symptom/complaint    |          | S20 Corn/callosity                         |          | U78 Benign neoplasm urinary tract               | <b>Male Genital</b>                      |
| P23 Adolescent behav. Symptom/compl.     |          | S21 Skin texture symptom/complaint         |          | U79 Neoplasm urinary tract NOS                  | <b>Y</b>                                 |
| P24 Specific learning problem            |          | S22 Nail symptom/complaint                 |          | U80 Injury urinary tract                        | Y01 Pain in penis                        |
| P25 Phase of life problem adult          |          | S23 Hair loss/baldness                     |          | U85 Congenital anomaly urinary tract            | Y02 Pain in testis/scrotum               |
| P27 Fear of mental disorder              |          | S24 Hair/scalp symptom/complaint           |          | U88 Glomerulonephritis/nephrosis                | Y03 Urethral discharge                   |
| P28 Limited function/disability (p)      |          | S26 Fear of cancer of skin                 |          | U90 Orthostatic albumin./proteinuria            | Y04 Penis symptom/complaint other        |
| P29 Psychological symptom/complpt other  |          | S27 Fear of skin disease other             |          | U95 Urinary calculus                            | Y05 Scrotum/testis sympt/compl. other    |
| P70 Dementia                             |          | S28 Limited function/disability (s)        |          | U98 Abnormal urine test NOS                     | Y06 Prostate symptom/complaint           |
| P71 Organic psychosis other              |          | S29 Skin symptom/complaint other           |          | U99 Urinary disease, other                      | Y07 Impotence NOS                        |
| P72 Schizophrenia                        |          | S70 Herpes zoster                          |          | <b>Pregnancy, Childbearing, Family Planning</b> | Y08 Sexual function sympt./compl. (m)    |
| P73 Affective psychosis                  |          | S71 Herpes simplex                         |          | <b>W</b>                                        | Y10 Infertility/subfertility male        |
| P74 Anxiety disorder/anxiety state       |          | S72 Scabies/other acariasis                |          | W01 Question of pregnancy                       | Y13 Sterilization male                   |
| P75 Somatization disorder                |          | S73 Pediculosis/skin infestation other     |          | W02 Fear of pregnancy                           | Y14 Family planning male other           |
| P76 Depressive disorder                  |          | S74 Dermatophytosis                        |          | W03 Antepartum bleeding                         | Y16 Breast symptom/complaint male        |
| P77 Suicide/suicide attempt              |          | S75 Moniliasis/candidiasis skin            |          | W05 Pregnancy vomiting/nausea                   | Y24 Fear of sexual dysfunction male      |
| P78 Neuraesthesia/surmenage              |          | S76 Skin infection other                   |          | W10 Contraception postcoital                    | Y25 Fear sexually transmitted dis. male  |
| P79 Phobia/compulsive disorder           |          | S77 Malignant neoplasm of skin             |          | W11 Contraception oral                          | Y26 Fear of genital cancer male          |
| P80 Personality disorder                 |          | S78 Lipoma                                 |          | W12 Contraception intrauterine                  | Y27 Fear of genital disease male other   |
| P81 Hyperkinetic disorder                |          | S79 Neoplasm skin benign/unspecified       |          | W13 Sterilization                               | Y28 Limited function/disability (y)      |
| P82 Post-traumatic stress disorder       |          | S80 Solar keratosis/sunburn                |          | W14 Contraception other                         | Y29 Genital sympt./compl. male other     |
| P85 Mental retardation                   |          | S81 Haemangioma/lymphangioma               |          | W15 Infertility/subfertility                    | Y70 Syphilis male                        |
| P86 Anorexia nervosa/bulimia             |          | S82 Naevus/mole                            |          | W18 Post-partum symptom/complaint oth.          | Y71 Gonorrhoea male                      |
| P98 Psychosis NOS/other                  |          | S83 Congenital skin anomaly other          |          | W19 Breast/lactation symptom/complaint          | Y72 Genital herpes male                  |
| P99 Psychological disorders, other       |          | S84 Impetigo                               |          | W21 Concern body image in pregnancy             | Y73 Prostatitis/seminal vesiculitis      |
| <b>Respiratory</b>                       | <b>R</b> | S85 Pilonidal cyst/fistula                 |          | W27 Fear complications of pregnancy             | Y74 Orchitis/epididymitis                |
| R01 Pain respiratory system              |          | S86 Dermatitis seborrhoic                  |          | W28 Limited function/disability (w)             | Y75 Balanitis                            |
| R02 Shortness of breath/dyspnoea         |          | S87 Dermatitis/atopic eczema               |          | W29 Pregnancy symptom/complaint other           | Y76 Condylomata acuminata male           |
| R03 Wheezing                             |          | S88 Dermatitis contact/allergic            |          | W70 Puerperal infection/sepsis                  | Y77 Malignant neoplasm prostate          |
| R04 Breathing problem, other             |          | S89 Diaper rash                            |          | W71 Infection complicating pregnancy            | Y78 Malign neoplasm male genital other   |
| R05 Cough                                |          | S90 Pityriasis rosea                       |          | W72 Malignant neoplasm relate to preg.          | Y79 Benign/unspec. neoplasm gen. (m)     |
| R06 Nose bleed/epistaxis                 |          | S91 Psoriasis                              |          | W73 Benign/unspec. neoplasm/pregnancy           | <b>Injury male genital</b>               |
| R07 Sneezing/nasal congestion            |          | S92 Sweat gland disease                    |          | W75 Injury complicating pregnancy               | Y81 Phimosi/redundant prepuce            |
| R08 Nose symptom/complaint other         |          | S93 Sebaceous cyst                         |          | W76 Congenital anomaly complicate preg.         | Y82 Hypospadias                          |
| R09 Sinus symptom/complaint              |          | S94 Ingrowing nail                         |          | W78 Pregnancy                                   | Y83 Undescended testicle                 |
| R21 Throat symptom/complaint             |          | S95 Molluscum contagiosum                  |          | W79 Unwanted pregnancy                          | Y84 Congenital genl anomaly (m) other    |
| R23 Voice symptom/complaint              |          | S96 Acne                                   |          | W80 Ectopic pregnancy                           | Y85 Benign prostatic hypertrophy         |
| R24 Haemoptysis                          |          | S97 Chronic ulcer skin                     |          | W81 Toxaemia of pregnancy                       | Y86 Hydrocoele                           |
| R25 Sputum/phlegm abnormal               |          | S98 Urticaria                              |          | W82 Abortion spontaneous                        | Y99 Genital disease male, other          |
| R26 Fear of cancer respiratory system    |          | S99 Skin disease, other                    |          | W83 Abortion induced                            | <b>Social Problems</b>                   |
| R27 Fear of respiratory disease, other   |          | <b>Endocrine/Metabolic and Nutritional</b> | <b>T</b> | W84 Pregnancy high risk                         | <b>Z</b>                                 |
| R28 Limited function/disability (r)      |          | T01 Excessive thirst                       |          | W85 Gestational diabetes                        | Z01 Poverty/financial problem            |
| R29 Respiratory symptom/complaint oth.   |          | T02 Excessive appetite                     |          | W90 Uncomplicate labour/delivery live           | Z02 Food/water problem                   |
| R71 Whooping cough                       |          | T03 Loss of appetite                       |          | W91 Uncomplicate labour/delivery still          | Z03 Housing/ neighbourhood problem       |
| R72 Strep throat                         |          | T04 Feeding problem of infant/child        |          | W92 Complicate labour/ delivery live/birth      | Z04 Social cultural problem              |
| R73 Boil/abscess nose                    |          | T05 Feeding problem of adult               |          | W93 Complicate labour/delivery stillbirth       | Z05 Work problem                         |
| R74 Upper respiratory infection acute    |          | T07 Weight gain                            |          | W94 Puerperal mastitis                          | Z06 Unemployment problem                 |
| R75 Sinusitis acute/chronic              |          | T08 Weight loss                            |          | W95 Breast disorder in pregnancy other          | Z07 Education problem                    |
| R76 Tonsillitis acute                    |          | T10 Growth delay                           |          | W96 Complications of puerperium other           | Z08 Social welfare problem               |
| R77 Laryngitis/tracheitis acute          |          | T11 Dehydration                            |          | W99 Disorder pregnancy/delivery, other          | Z09 Legal problem                        |
| R78 Acute bronchitis/bronchiolitis       |          | T26 Fear of cancer of endocrine system     |          | <b>Female Genital</b>                           | Z10 Health care system problem           |
| R79 Chronic bronchitis                   |          | T27 Fear endocrine/metabolic dis other     |          | <b>X</b>                                        | Z11 Compliance/being ill problem         |
| R80 Influenza                            |          | T28 Limited function/disability (t)        |          | X01 Genital pain female                         | Z12 Relationship problem with partner    |
| R81 Pneumonia                            |          | T29 Endocrine/met./sympt/complpt other     |          | X02 Menstrual pain                              | Z13 Partner's behaviour problem          |
| R82 Pleurisy/pleural effusion            |          | T70 Endocrine infection                    |          | X03 Intermenstrual pain                         | Z14 Partner illness problem              |
| R83 Respiratory infection other          |          | T71 Malignant neoplasm thyroid             |          | X04 Painful intercourse female                  | Z15 Loss/death of partner problem        |
| R84 Malignant neoplasm bronchus/lung     |          | T72 Benign neoplasm thyroid                |          | X05 Menstruation absent/scanty                  | Z16 Relationship problem with child      |
| R85 Malinant neoplasm respiratory, other |          | T73 Neoplasm endocrine oth/unspecified     |          | X06 Menstruation excessive                      | Z18 Illness problem with child           |
| R86 Benign neoplasm respiratory          |          | T78 Thyroglossal duct/cyst                 |          | X07 Menstruation irregular/frequent             | Z19 Loss/death of child problem          |
| R87 Foreign body nose/larynx/bronch      |          | T80 Congenital anom endocrine/metab.       |          | X08 Intermenstrual bleeding                     | Z20 Relationship prob. parent/family     |
| R88 Injury respiratory other             |          | T81 Goitre                                 |          | X09 Premenstrual symptom/complaint              | Z21 Behaviour problem parent/family      |
| R89 Congenital anomaly respiratory       |          | T82 Obesity                                |          | X10 Postponement of menstruation                | Z22 Illness problem parent/family        |
| R90 Hypertrophy tonsils/adenoids         |          | T83 Overweight                             |          | X11 Menopausal symptom/complaint                | Z23 Loss/death parent/family member      |
| R92 Neoplasm respiratory unspecified     |          | T85 Hyperthyroidism/thyrotoxicosis         |          | X12 Postmenopausal bleeding                     | Z24 Relationship problem friend          |
| R95 Chronic obstructive pulmonary dis    |          | T86 Hypothyroidism/myxoedema               |          | X13 Postcoital bleeding                         | Z25 Assault/harmful event problem        |
| R96 Asthma                               |          | T87 Hypoglycaemia                          |          | X14 Vaginal discharge                           | Z27 Fear of a social problem             |
| R97 Allergic rhinitis                    |          | T89 Diabetes insulin dependent             |          | X15 Vaginal symptom/complaint other             | Z28 Limited function/disability (z)      |
| R98 Hyperventilation syndrome            |          | T90 Diabetes non-insulin dependent         |          | X16 Vulval symptom/complaint                    | Z29 Social problem NOS                   |
| R99 Respiratory disease other            |          | T91 Vitamin/nutritional deficiency         |          | X17 Pelvis symptom/complaint female             |                                          |
| <b>PROCESS CODES</b>                     |          | T92 Gout                                   |          | X18 Breast pain female                          |                                          |
| <b>SYMPTOMS/COMPLAINTS</b>               |          | T93 Lipid disorder                         |          | X19 Breast lump/mass female                     |                                          |
| <b>INFECTIONS</b>                        |          | T99 Endocrine/metab/nutrit. dis. other     |          | X20 Nipple symptom/complaint female             |                                          |
| <b>NEOPLASMS</b>                         |          |                                            |          | X21 Breast symptom/compl. female other          |                                          |
| <b>INJURIES</b>                          |          |                                            |          | X22 Concern breast appearance female            |                                          |
| <b>CONGENITAL ANOMALIES</b>              |          |                                            |          | X23 Fear sexually transmitted disease (f)       |                                          |
| <b>OTHER DIAGNOSES</b>                   |          |                                            |          | X24 Fear of sexual dysfunction female           |                                          |
|                                          |          |                                            |          | X25 Fear of genital cancer female               |                                          |
|                                          |          |                                            |          | X26 Fear of breast cancer female                |                                          |
|                                          |          |                                            |          | X27 Fear genital/breast disease other (f)       |                                          |
|                                          |          |                                            |          | X28 Limited function/disability (x)             |                                          |
|                                          |          |                                            |          | X29 Genital symptom/complpt female oth.         |                                          |
|                                          |          |                                            |          | X70 Syphilis female                             |                                          |
|                                          |          |                                            |          | X71 Gonorrhoea female                           |                                          |
|                                          |          |                                            |          | X72 Genital candidiasis female                  |                                          |
|                                          |          |                                            |          | X73 Genital trichomoniasis female               |                                          |
|                                          |          |                                            |          | X74 Pelvic inflammatory disease                 |                                          |
|                                          |          |                                            |          |                                                 | <b>Abbreviations</b>                     |
|                                          |          |                                            |          |                                                 | Anom anomaly                             |
|                                          |          |                                            |          |                                                 | behav. behaviour                         |
|                                          |          |                                            |          |                                                 | bronch. bronchus                         |
|                                          |          |                                            |          |                                                 | complicat. complication                  |
|                                          |          |                                            |          |                                                 | congen. congenital                       |
|                                          |          |                                            |          |                                                 | dis. disease                             |
|                                          |          |                                            |          |                                                 | eval. evaluation                         |
|                                          |          |                                            |          |                                                 | exam. examination                        |
|                                          |          |                                            |          |                                                 | gen. genital                             |
|                                          |          |                                            |          |                                                 | malig. malignant                         |
|                                          |          |                                            |          |                                                 | metab. metabolic                         |
|                                          |          |                                            |          |                                                 | musculo. musculoskeletal                 |
|                                          |          |                                            |          |                                                 | NEC not elsewhere classified             |
|                                          |          |                                            |          |                                                 | NOS not otherwise specified              |
|                                          |          |                                            |          |                                                 | nutrit. nutrition                        |
|                                          |          |                                            |          |                                                 | oth. other                               |
|                                          |          |                                            |          |                                                 | preg. pregnancy                          |
|                                          |          |                                            |          |                                                 | prob. problem                            |
|                                          |          |                                            |          |                                                 | RFE reason for encounter                 |
|                                          |          |                                            |          |                                                 | sympt. symptom                           |
|                                          |          |                                            |          |                                                 | unspec. unspecified                      |
|                                          |          |                                            |          |                                                 | w with                                   |
|                                          |          |                                            |          |                                                 | w/o without                              |
